# Supplementary material for: Structuring biogenic synthesis of rare phase LaMn2O5 using the Bauhinia variegata (Kachnar) flower extract for highly sensitive, long range electrochemical detection of bisphenol-A, an endocrine disruptor
Source: Royal Society of Chemistry journal article supplement (doi:10.1039/d3ma00790a), 2023-11-23
Supplement: d3ma00790a1.pdf [file d3ma00790a1.pdf]

## Supplementary file

# Structuring Biogenic Synthesis of Rare Phase $\text{LaMn}_2\text{O}_5$ Using *Bauhinia Variegata* (Kachnar) Flower Extract for Highly Sensitive, Long Range Electrochemical Detection of Bisphenol-A, an Endocrine Disruptor

Ankur Srivastava<sup>1</sup>, Kshitij. RB. Singh<sup>1</sup>, Mrituanjay D. Pandey\*<sup>1</sup> and Jay Singh\*<sup>1</sup>

<sup>1</sup>*Department of Chemistry, Institute of Science, Banaras Hindu University, Varanasi-221005 Uttar Pradesh, India.*

\*Corresponding Author: Email: [mdpandey.chem@bhu.ac.in](mailto:mdpandey.chem@bhu.ac.in) (MPD) ORCID ID: <https://orcid.org/0000-0001-5221-9459> and Email: [jaysingh.chem@bhu.ac.in](mailto:jaysingh.chem@bhu.ac.in) (JS), ORCID ID: 0000-0002-3793-0450; Phone: +91-9871766453)

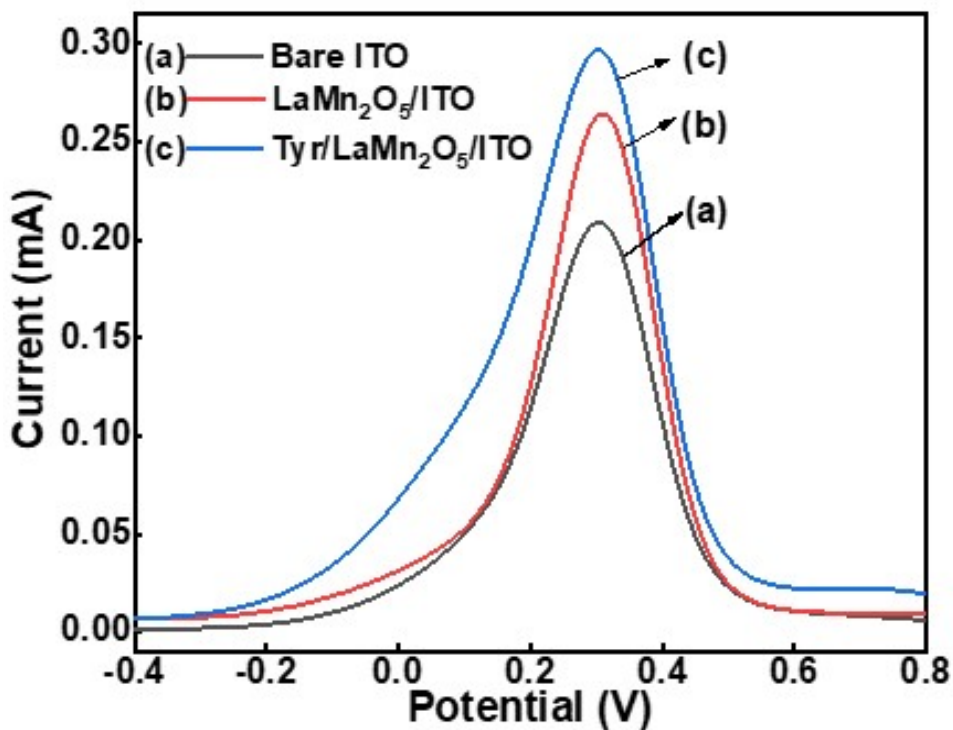

Figure [S1]; DPV graph showing  $I_p$  current for bare ITO electrode (a),  $\text{LaMn}_2\text{O}_5/\text{ITO}$  electrode (b), Tyr/ $\text{LaMn}_2\text{O}_5/\text{ITO}$  bioelectrode (c)

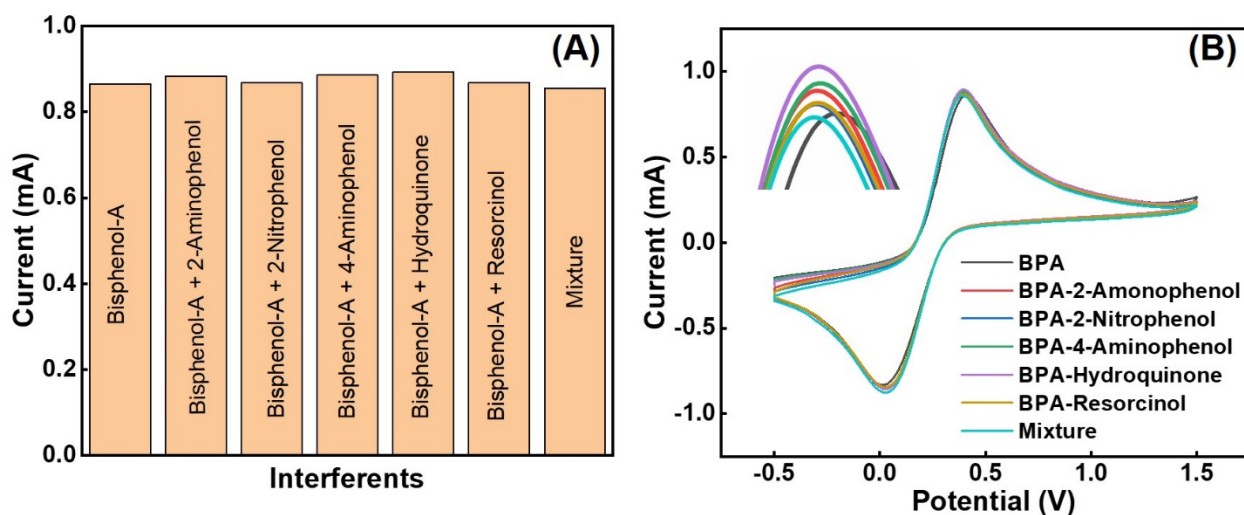

Figure [S2]; (A) & (B) shows the selectivity analysis for the Bisphenol-A using various interference analytes containing phenolic groups.

Table [T1]; Shows the percent RSD value for the interferents in the selectivity analysis.

| <b>BPA with interfering substance (50 <math>\mu</math>M each)</b> | <b>Cathodic peak current (I<sub>pa</sub>; mA)</b> | <b>% RSD</b> |
|-------------------------------------------------------------------|---------------------------------------------------|--------------|
| BPA                                                               | 0.8658                                            | Standard     |
| BPA-2-Aminophenol                                                 | 0.8837                                            | 2.06         |
| BPA-2-Nitrophenol                                                 | 0.8682                                            | 0.27         |
| BPA-4-Aminophenol                                                 | 0.8860                                            | 2.33         |
| BPA-Hydroquinone                                                  | 0.8938                                            | 3.23         |
| BPA-Resorcinol                                                    | 0.8558                                            | 0.27         |
| Mixture                                                           | 0.8682                                            | 0.71         |
